# Supplementary material
Source: PubMed Central journal article supplement (PMC7612546)

# Supplementary figure 1

## a Gating strategy innate flow cytometry panel

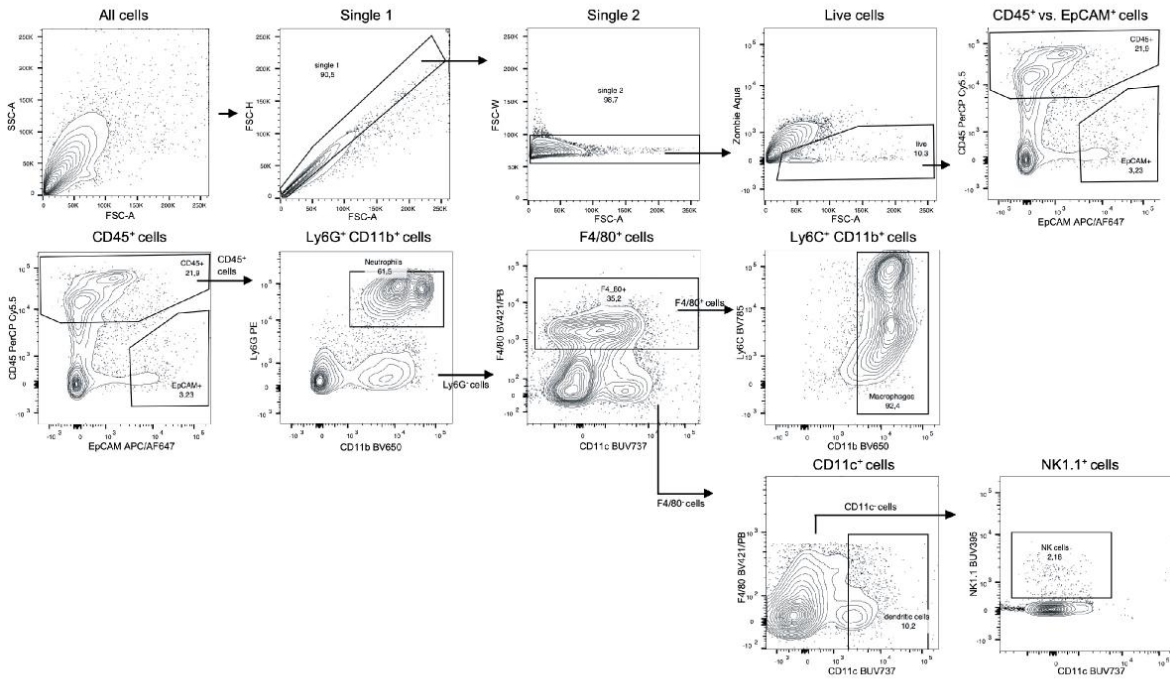

## b Gating strategy adaptive flow cytometry panel

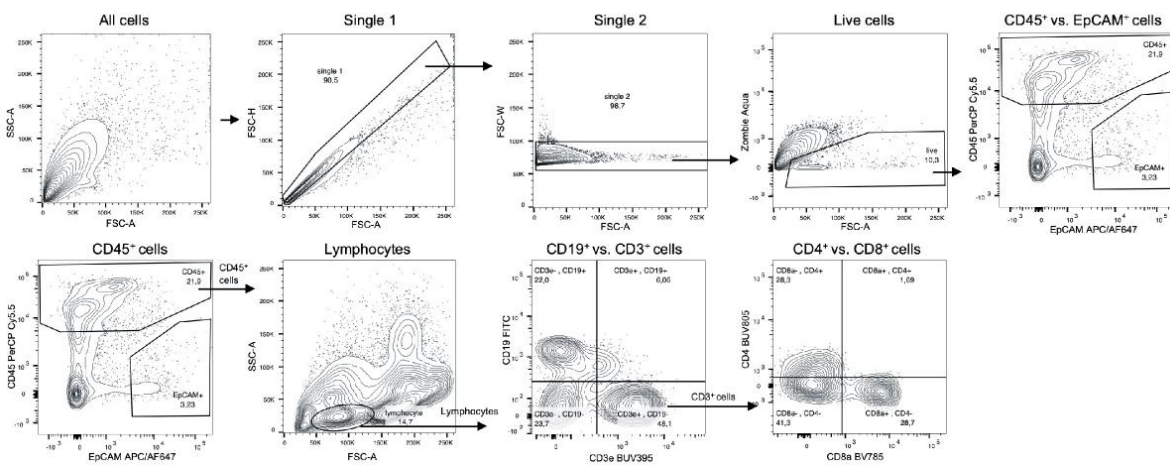

Supplement: EMS140566-supplement-Supplementary_Information_Supplementary_Figure_1.pdf [file EMS140566-supplement-Supplementary_Information_Supplementary_Figure_1.pdf]
